# Supplementary material for: New Insights into Interactions between Mushroom Aegerolysins and Membrane Lipids
Source: MDPI journal article supplement (doi:10.3390/toxins16030143), 2024-03-09
Supplement: s1 [file s1]

# Supplementary Materials: New Insights into Interactions between Mushroom Aegerolysins and Membrane Lipids

Larisa Lara Popošek, Nada Kraševac, Gregor Bajc, Urška Glavač, Matija Hrovatin, Žan Perko, Ana Slavič, Miha

## 1. Supplementary Materials and Methods

### 1.1. Expression and Purification of Aegerolysins and their MACPF Protein Partners

The aegerolysins OlyA6, NudA, HetA, VerA,  $\Delta 37$ VerA, and MucA were constructed as C-terminally tagged His<sub>6</sub> (H<sub>6</sub>) fusion proteins. These proteins were expressed as soluble proteins in the BL21(DE3) or in the BL21(DE3) pLysE *E. coli* strains. Their MACPF protein partners  $\Delta 48$ PlyB (henceforth PlyB),  $\Delta 21$ HetB (henceforth HetB),  $\Delta 29$ VerB (henceforth VerB),  $\Delta 30$ NudB (henceforth NudB) and  $\Delta 43$ NudB (henceforth NudB) were constructed as N-terminally tagged His<sub>6</sub> (H<sub>6</sub>) fusion proteins and expressed in inclusion bodies in the BL21(DE3) *E. coli* strains and then refolded. After transformation, the cells were grown on LB plates with 100  $\mu$ g/mL of ampicillin (Sigma, USA) (LBAp) or with 50  $\mu$ g/mL of kanamycin (Sigma, USA) (LBKn). A single colony was then inoculated into 100 mL LBAp or LBKn medium, and grown overnight at 37 °C on a rotating wheel. The overnight culture (5 mL) was inoculated into 500 mL LBAp or LBKn medium. Typically, 1 L of bacterial culture were grown at 37 °C up to an optical density ( $A_{600}$ ) of 0.6 to 0.8. After induction of the production of the recombinant proteins using 0.5 mM isopropyl  $\beta$ -D-1-thiogalactopyranoside (IPTG) (Sigma, USA), bacterial growth was continued overnight at 22 °C. The bacteria were then centrifuged for 30 min at 4.370 $\times$ g and 4 °C. The bacterial pellet was kept on ice during homogenization. The cells were resuspended at (2 ml buffer/g dry weight bacteria) in lysis buffer (50 mM NaH<sub>2</sub>PO<sub>4</sub>, 300 mM NaCl, 10 mM imidazole, pH 8.0), supplemented with lysozyme (0.5 mg/mL) (Merck, USA), benzoase (5 U/mL) (Merck, USA), RNase (20  $\mu$ g/mL) (Sigma, USA), protease inhibitors (1 tablet/10 mL) (Roche, Switzerland), and  $\beta$ -mercaptoethanol (20 mM) (Sigma, USA), shaken for 30 min at 4 °C, and sonicated (Vibracell, Sonics, USA) at 40 % amplitude for 10 min on ice. The homogenate was centrifuged for 30 min at 26.323 $\times$ g at 4 °C.

#### 1.1.1. Isolation of recombinant aegerolysins OlyA6, NudA, HetA, VerA, $\Delta 37$ VerA, and MucA

After centrifugation the obtained supernatants were kept at 4 °C, and the pellets were resuspended again in lysis buffer (1 ml buffer/g dry weight bacteria). Shaking for 30 min on ice was followed by 10 min of sonication on ice and centrifugation (30 min at 26.323 $\times$ g at 4 °C). Both supernatants were then merged and filtered through a 0.2- $\mu$ m cellulose-acetate filter and then loaded onto a 1.5 mL Ni<sup>2+</sup>-NTA column equilibrated in buffer A containing 50 mM NaH<sub>2</sub>PO<sub>4</sub>, 300 mM NaCl, 10 mM imidazole and 20 mM  $\beta$ -mercaptoethanol, pH 8.0. Non-specifically bound proteins were eluted with 50 mM of NaH<sub>2</sub>PO<sub>4</sub>, 300 mM of NaCl, 20 mM of imidazole, pH 8.0, and the residual proteins were eluted with 300 mM of imidazole in the same buffer. After elution, the sample buffer was exchanged for 20 mM of HEPES, 140 mM of NaCl, pH 8.0, and was used in the further purification on size exclusion column (GE Healthcare, UK). After elution, the sample buffer was exchanged again for 20 mM of HEPES, 140 mM of NaCl (pH 7.0 or 8.0), or 20 mM of MES 140 mM of NaCl (pH 6.0).

#### 1.1.2. Isolation of recombinant MACPF proteins partners PlyB, HetB, NudB, MucB, and VerB

To refold insoluble MACPF proteins PlyB, NudB, HetB, VerB, and MucB the pellets after centrifugation were resuspended in 20 mM Tris-HCl, pH 8.0 (3 mL buffer/g wet mass), sonicated for 10 min on ice (40 % amplitude) and then centrifuged for 30 min at 26.323 $\times$ g. The inclusion bodies were then washed in 20 mM Tris-HCl, 0.5 M NaCl, 2 M

urea, 2 % (v/v) Triton X-100, pH 8.0 (5 mL/g of sediment wet mass). Sonication and centrifugation were repeated, and the pellets were resuspended in the same buffer without urea and centrifuged again, as before. The washed inclusion bodies were then dissolved by stirring the inclusion bodies overnight at 4 °C in 20 mM of Tris-HCl, 0.5 M of NaCl, 6 M of guanidinium chloride, 5 mM of imidazole, 5 mM of  $\beta$ -mercaptoethanol, at pH 8.0 (3 mL of buffer/g inclusion body wet mass), and centrifuged for 30 min at 17.000×g at 4 °C. The dissolved proteins were refolded by 100-fold dilution in 20 mM of Tris-HCl, 0.5 mM of NaCl, 5 mM of imidazole, 5 mM of  $\beta$ -mercaptoethanol, at pH 8.0 and at 4 °C. The insoluble materials were removed by 30 min centrifugation at 17.000×g, and the refolded proteins were purified on a Ni<sup>2+</sup>-NTA column. After elution, the sample buffer was exchanged for 140 mM of NaCl, 20 mM of Tris-HCl, and 5 % (v/v) glycerol at pH 8.0 and stored at -20 °C. Freshly thawed aliquots were used in the functional studies, to minimize spontaneous protein degradation.

## 2. Supplementary tables

**Table S1.** Aegerolysins from the class Agaricomycetes in species with published genomes.

| Genome                                                                                  | Order       | Aegerolysin<br>PF06355 | OlyA6 JGI<br>Blast | Aegerolysin<br>Protein Number      | MACPF<br>PF01823 | PlyB JGI<br>Blast | Genome<br>Reference |
|-----------------------------------------------------------------------------------------|-------------|------------------------|--------------------|------------------------------------|------------------|-------------------|---------------------|
| <i>Galerina marginata</i> v1.0                                                          | Agaricales  | 1                      | 0                  | Galma1 143730                      | 0                | 0                 | [57]                |
| <i>Lepista nuda</i> CBS 247.69 v1.0                                                     | Agaricales  | 1                      | 1                  | Lepnud1 1174238*                   | 0                | 1                 | [58]                |
| <i>Oudemansiella mucida</i> CBS 558.79 v1.0 ( <i>Mucidula mucida</i> )                  | Agaricales  | 1                      | 1                  | Oudmuc1 1429373*                   | 0                | 1                 | [58]                |
| <i>Pleurotus ostreatus</i> PC15 v2.0                                                    | Agaricales  | 1                      | 1                  | Pleo-sPC15_2 1090164**             | 2                | 1 <sup>#</sup>    | [57]                |
| <i>Pleurotus ostreatus</i> PC9 v1.0                                                     | Agaricales  | 1                      | 1                  | PleosPC9_1 72745*                  | 3                | 1 <sup>#</sup>    | [59]                |
| <i>Pterula gracilis</i> CBS309.79 v1.0                                                  | Agaricales  | 1                      | 0                  | Ptegral 557421 <sup>cs</sup>       | 0                | 0                 | [60]                |
| <i>Gyrodon lividus</i> BX v1.0                                                          | Boletales   | 1                      | 0                  | Gyrli1 877364                      | 0                | 0                 | [61]                |
| <i>Paxillus ammoniavirescens</i> Pou09.2 v1.0                                           | Boletales   | 1                      | 0                  | Paxam1 1014777                     | 0                | 0                 | [61]                |
| <i>Paxillus adelphus</i> Ve08.2h10 v2.0                                                 | Boletales   | 1                      | 0                  | Paxru2 1809802                     | 0                | 0                 | [62]                |
| <i>Pisolithus croceorrhizus</i> subspA 74A v1.0                                         | Boletales   | 1                      | 0                  | Piscro1 383570                     | 1                | 0                 | [63]                |
| <i>Pisolithus</i> sp. B1 v1.0                                                           | Boletales   | 1                      | 0                  | Pismi_AB1_1 1098592                | 1                | 0                 | [63]                |
| <i>Pisolithus orientalis</i> OTSU v2.0                                                  | Boletales   | 1                      | 1                  | Pisori2 840897                     | 0                | 1                 | [63]                |
| <i>Pisolithus thermaeus</i> 11 v1.0                                                     | Boletales   | 1                      | 0                  | Pisthe1 1755645                    | 1                | 1                 | [63]                |
| <i>Pisolithus croceorrhizus</i> ssp. 2 72 v1.0                                          | Boletales   | 1                      | 0                  | Pisthe227_1 2266095                | 0                | 1                 | [63]                |
| <i>Serpula himantoides</i> ( <i>S. lacrymans</i> var <i>shastensis</i> ) MUCL38935 v1.0 | Boletales   | 1                      | 1                  | Serla_varsha1 57805 <sup>cs</sup>  | 0                | 0                 | [64]                |
| <i>Punctularia strigosozonata</i> v1.0                                                  | Corticiales | 1                      | 1                  | Punst1 101965                      | 0                | 0                 | [65]                |
| <i>Cyrtidiella melzeri</i> FP 102339 v1.0                                               | Polyporales | 1                      | 1                  | Cytmel1 219606                     | 25               | 0                 | [66]                |
| <i>Dichomitus squalens</i> LYAD-421 SS1 v1.0                                            | Polyporales | 1                      | 1                  | Dicsq1 69680                       | 0                | 0                 | [65]                |
| <i>Dichomitus squalens</i> OM18370.1 v1.0                                               | Polyporales | 1                      | 1                  | Dicsqu18370_1 667277 <sup>cs</sup> | 0                | 0                 | [67]                |
| <i>Dichomitus squalens</i> CBS463.89 v1.0                                               | Polyporales | 1                      | 1                  | Dicsqu463_1 869446 <sup>cs</sup>   | 0                | 0                 | [67]                |
| <i>Dichomitus squalens</i> CBS464.89 v1.0                                               | Polyporales | 1                      | 1                  | Dicsqu464_1 982219                 | 0                | 0                 | [67]                |
| <i>Hydnopolyporus fimbriatus</i> CBS384.51 v1.0                                         | Polyporales | 1                      | 0                  | Hydpi2 169438                      | 0                | 2                 | [66]                |
| <i>Irpex lacteus</i> CCBAS Fr. 238 617/93 v1.0                                          | Polyporales | 1                      | 0                  | Irplac1 1724138 <sup>cs</sup>      | 5                | 0                 | [66]                |
| <i>Pycnoporus puniceus</i> CIRM-BRFM 1868 v1.0                                          | Polyporales | 1                      | 1                  | Pycpun1 203258*                    | 1                | 1                 | [61]                |
| <i>Trametes betulina</i> CIRM-BRFM 1801 v1.0                                            | Polyporales | 1                      | 1                  | Trabet1 845770*                    | 1                | 1                 | [66]                |
| <i>Trametopsis cervina</i> CIRM-BRFM 1824 v1.0                                          | Polyporales | 1                      | 1                  | Trace1 560779                      | 4                | 0                 | [66]                |
| <i>Trametes gibbosa</i> CIRM-BRFM 1770 v1.0                                             | Polyporales | 1                      | 1                  | Tragib1 1322232 <sup>cs</sup>      | 0                | 1                 | [66]                |
| <i>Trametes maxima</i> CIRM-BRFM 1813 v1.0                                              | Polyporales | 1                      | 1                  | Tramax1 336724                     | 1                | 0                 | [66]                |

| Genome                                         | Order       | Aegerolysin<br>PF06355 | OlyA6 JGI<br>Blast | Aegerolysin<br>Protein Number                                                                  | MACPF<br>PF01823 | PlyB JGI<br>Blast | Genome<br>Reference |
|------------------------------------------------|-------------|------------------------|--------------------|------------------------------------------------------------------------------------------------|------------------|-------------------|---------------------|
| <i>Trametes meyenii</i> CIRM-BRFM 1810 v1.0    | Polyporales | 1                      | 1                  | Tramey1 1013932                                                                                | 0                | 0                 | [66]                |
| <i>Trametes pubescens</i> FBCC735              | Polyporales | 1                      | 1                  | Trapub1 5034                                                                                   | 0                | 2                 | [68]                |
| <i>Trametes versicolor</i> v1.0                | Polyporales | 1                      | 1                  | Trave1 52920*                                                                                  | 0                | 1 <sup>#</sup>    | [65]                |
| <i>Heterobasidion annosum</i> v2.0             | Russulales  | 1                      | 1                  | Hetan2 148469*                                                                                 | 0                | 1 <sup>#</sup>    | [69]                |
| <i>Crepidotus variabilis</i> CBS 506.95 v1.0   | Agaricales  | 2                      | -                  | Crevar1 769707<br>Crevar1 838031                                                               | -                | -                 | [58]                |
| <i>Hypoholoma sublateralitium</i> v1.0         | Agaricales  | 2                      | -                  | Hypsu1 208850<br>Hypsu1 208851                                                                 | -                | -                 | [62]                |
| <i>Laccaria amethystina</i> LaAM-08-1 v2.0     | Agaricales  | 2                      | -                  | Lacam2 687022<br>Lacam2 1678639                                                                | -                | -                 | [62]                |
| <i>Moniliophthora roreri</i> MCA 2997          | Agaricales  | 2                      | -                  | MroMCA2997_1 8059<br>MroMCA2997_1 12739 <sup>c</sup>                                           | -                | -                 | [70]                |
| <i>Pleurotus eryngii</i> ATCC 90797 v1.0       | Agaricales  | 2                      | -                  | Pleery1 1387261<br>Pleery1 1444518                                                             | -                | -                 | [58]                |
| <i>Paxillus involutus</i> ATCC 200175 v1.0     | Boletales   | 2                      | -                  | Paxin1 9942<br>Paxin1 9943                                                                     | -                | -                 | [62]                |
| <i>Pisolithus albus</i> SI12 v1.0              | Boletales   | 2                      | -                  | Pisalb1 1121001<br>Pisalb1 2167476                                                             | -                | -                 | [63]                |
| <i>Pisolithus microcarpus</i> 441 v2.0         | Boletales   | 2                      | -                  | Pismi2 4275208<br>Pismi2 688450                                                                | -                | -                 | [62]                |
| <i>Fibroporia radiculosa</i> TFFH 294          | Polyporales | 2                      | -                  | Fibra1 8583<br>Fibra1 8593                                                                     |                  |                   | [71]                |
| <i>Lyophyllum atratum</i> CBS 144462 v1.0      | Agaricales  | 3                      | -                  | Lyoat1 1430114<br>Lyoat1 1453442<br>Lyoat1 1456029                                             | -                | -                 | [72]                |
| <i>Volvariella volvacea</i> V23                | Agaricales  | 3                      | -                  | Volvo1 116806<br>Volvo1 121057<br>Volvo1 121539                                                | -                | -                 | [73]                |
| <i>Pisolithus marmoratus</i> ssp. 2 16A v1.0   | Boletales   | 3                      | -                  | Pismar1 2600390<br>Pismar1 2666719<br>Pismar1 2685475                                          | -                | -                 | [63]                |
| <i>Lentinus tigrinus</i> ALCF2SS1-6 v1.0       | Polyporales | 3                      | -                  | Lenti6_1 580338<br>Lenti6_1 580340<br>Lenti6_1 580351                                          | -                | -                 | [74]                |
| <i>Lentinus tigrinus</i> ALCF2SS1-7 v1.0       | Polyporales | 3                      | -                  | Lenti7_1 523664<br>Lenti7_1 523675<br>Lenti7_1 571802                                          | -                | -                 | [74]                |
| <i>Polyporus squamosus</i> CCBS 676 v1.0       | Polyporales | 3                      | -                  | Polsqu1573877<br>Polsqu1645443<br>Polsqu1707804                                                | -                | -                 | [66]                |
| <i>Lactifluus cf. subvellereus</i> BPL653 v1.0 | Russulales  | 3                      | -                  | Lacsub1 1211756<br>Lacsub1 1211789<br>Lacsub1 1211835                                          | -                | -                 | [75]                |
| <i>Lanmaoa asiatica</i> v1.0                   | Boletales   | 4                      | -                  | Lanmao1 5926 <sup>c</sup><br>Lanmao1 7528<br>Lanmao1 9032<br>Lanmao1 9180                      | -                | -                 | [76]                |
| <i>Phlebopus</i> sp. FC_14 v2.0                | Boletales   | 4                      | -                  | PhlFC14_2 483767<br>PhlFC14_2 1801769<br>PhlFC14_2 1827079<br>PhlFC14_2 1947475                | -                | -                 | [76]                |
| <i>Sphaerobolus stellatus</i> v1.0             | Geastrales  | 4                      | -                  | Sphst1 29870<br>Sphst1 164791<br>Sphst1 191975<br>Sphst1 267302                                | -                | -                 | [62]                |
| <i>Obba rivulosa</i> 3A-2 v1.0                 | Polyporales | 4                      | -                  | Obbril1 189930<br>Obbril1 724008 <sup>c</sup><br>Obbril1 862642<br>Obbril1 887022 <sup>c</sup> | -                | -                 | [77]                |
| <i>Polyporus brumalis</i> CIRM-BRFM 1820 v1.0  | Polyporales | 4                      | -                  | Polbr1 493721<br>Polbr1 1403104<br>Polbr1 1403107<br>Polbr1 1482675 <sup>c</sup>               | -                | -                 | [61]                |
| <i>Russula rugulosa</i> BPL654 v1.0            | Russulales  | 4                      | -                  | Rusrug1 922004                                                                                 | -                | -                 | [75]                |

| Genome                                              | Order       | Aegerolysin<br>PF06355 | OlyA6 JGI<br>Blast | Aegerolysin<br>Protein Number                                                                                                                                                                                                                                                                                                                                                                                                                                                                                          | MACPF<br>PF01823 | PlyB JGI<br>Blast | Genome<br>Reference |
|-----------------------------------------------------|-------------|------------------------|--------------------|------------------------------------------------------------------------------------------------------------------------------------------------------------------------------------------------------------------------------------------------------------------------------------------------------------------------------------------------------------------------------------------------------------------------------------------------------------------------------------------------------------------------|------------------|-------------------|---------------------|
|                                                     |             |                        |                    | Rusrug1 925929<br>Rusrug1 1001040<br>Rusrug1 1191120                                                                                                                                                                                                                                                                                                                                                                                                                                                                   |                  |                   |                     |
| <i>Moniliophthora perniciosa</i> FA553              | Agaricales  | 6                      | -                  | Monpel_1 83513<br>Monpel_1 83795<br>Monpel_1 84536 <sup>c</sup><br>Monpel_1 86512<br>Monpel_1 91804<br>Monpel_1 92526                                                                                                                                                                                                                                                                                                                                                                                                  | -                | -                 | [78]                |
| <i>Polyporus arcularius</i> v1.0                    | Polyporales | 6                      | -                  | Polar1 492019<br>Polar1 547014<br>Polar1 586868<br>Polar1 591849<br>Polar1 598570<br>Polar1 606953                                                                                                                                                                                                                                                                                                                                                                                                                     | -                | -                 | [60]                |
| <i>Amanita rubescens</i> Pflba v1.0                 | Agaricales  | 7                      | -                  | Amarub1 650716<br>Amarub1 970520<br>Amarub1 991530<br>Amarub1 1079426 <sup>c</sup><br>Amarub1 1082242 <sup>c</sup><br>Amarub1 1111223 <sup>c</sup><br>Amarub1 1161814                                                                                                                                                                                                                                                                                                                                                  | -                | -                 | [61]                |
| <i>Panaeolus papilionaceus</i> CIRM-BRFM 715 v1.0   | Agaricales  | 7                      | -                  | Panpap1 19875<br>Panpap1 689993<br>Panpap1 1355982<br>Panpap1 1397581<br>Panpap1 1533752<br>Panpap1 1610024<br>Panpap1 1614630 <sup>c</sup>                                                                                                                                                                                                                                                                                                                                                                            | -                | -                 | [58]                |
| <i>Leucogyrophana mollusca</i> KUC20120723A-06 v1.0 | Boletales   | 15                     | -                  | Leumo1 1006919 <sup>c</sup><br>Leumo1 1015671<br>Leumo1 1031743<br>Leumo1 1031757<br>Leumo1 1040248<br>Leumo1 1041010<br>Leumo1 1041657<br>Leumo1 1042072<br>Leumo1 1050645<br>Leumo1 1097675<br>Leumo1 1099592<br>Leumo1 1130958<br>Leumo1 1133906<br>Leumo1 1133910<br>Leumo1 1134698                                                                                                                                                                                                                                | -                | -                 | [76]                |
| <i>Hygrophoropsis aurantiaca</i> ATCC 28755 v1.0    | Boletales   | 24                     | -                  | Hygaur1 163564<br>Hygaur1 720682<br>Hygaur1 1017232 <sup>c</sup><br>Hygaur1 1017358<br>Hygaur1 1102255<br>Hygaur1 1106052<br>Hygaur1 1157025<br>Hygaur1 1161011<br>Hygaur1 1164082<br>Hygaur1 1164280<br>Hygaur1 1164288<br>Hygaur1 1164298 <sup>c</sup><br>Hygaur1 1164886<br>Hygaur1 1164907<br>Hygaur1 1165900 <sup>c</sup><br>Hygaur1 1166697<br>Hygaur1 1166711<br>Hygaur1 1166992<br>Hygaur1 1167771<br>Hygaur1 1167895<br>Hygaur1 1168331<br>Hygaur1 1168496<br>Hygaur1 1168858<br>Hygaur1 1168971 <sup>c</sup> | -                | -                 | [78]                |

Aegerolysins (160) from published fungal genomes (60) identified in the JGI MycoCosm database [https://doi.org/10.1007/978-1-0716-2871-3\\_14](https://doi.org/10.1007/978-1-0716-2871-3_14); \*, Aegerolysin and MACPF gene pair; <sup>c</sup>, omitted from aegerolysin phylogenetic tree; <sup>s</sup>, omitted from phylogenetic tree out inferred from of singlet aegerolysins; <sup>†</sup>, manual annotation; MACPF, membrane attack complex/perforin.

**Table S2.** Basic biochemical characteristics of native aegeolysins analyzed in the study.

|         | Number of amino acids | MW (kDa) | Ip  | % Amino acid identity with OlyA6 |
|---------|-----------------------|----------|-----|----------------------------------|
| OlyA6   | 138                   | 15.1     | 5.5 | 100                              |
| NudA    | 138                   | 15.2     | 5.3 | 81.9                             |
| MucA    | 121                   | 13.3     | 6.9 | 75                               |
| HetA    | 137                   | 15.0     | 6.7 | 73.9                             |
| VerA    | 174                   | 19.2     | 5.1 | 55.1                             |
| Δ37VerA | 138                   | 15.2     | 7.7 | 55.1                             |

OlyA6, ostreolysin A6; NudA, nudolysin A; MucA, mucolysin A; HetA, heterolysin A; Δ37VerA, deletion mutant of versicolysin A; MW, molecular weight; kDa, kilo Dalton; Ip, isoelectric point.

**Table S3.** Basic biochemical characteristics of native MACPF proteins analyzed in the study.

|         | Number of amino acids | MW (kDa) | Ip  | % Amino acid identity with PlyB |
|---------|-----------------------|----------|-----|---------------------------------|
| Δ48PlyB | 476                   | 52.2     | 6.4 | 100                             |
| Δ30NudB | 475                   | 53.1     | 5.7 | 71.7                            |
| Δ43MucB | 491                   | 54.0     | 5.6 | 70                              |
| Δ21HetB | 474                   | 52.0     | 6.1 | 61.2                            |
| Δ29VerB | 477                   | 52.4     | 4.9 | 57.3                            |

Δ48PlyB, deletion mutant of pleurotolysin B; Δ30NudB, deletion mutant of nudolysin B; Δ43MucB, deletion mutant of mucolysin B; Δ21HetB, deletion mutant of heterolysin B; Δ29VerB, deletion mutant of versicolysin B; MW, molecular weight (kDa); Ip, isoelectric point; MACPF, membrane attack complex/perforin.

**Table S4.** The amounts of immobilized vesicles in RU units for each SPR experiment.

| pH | Aegeolysin | Sf9  | CPE:<br>POPC:Chol<br>(1:1:1) | RBC  | SM:Chol<br>(1:1) | PS:<br>POPC:<br>Chol<br>(1:1:1) | PE:<br>POPC:<br>Chol<br>(1:1:1) | CL:<br>POPC:<br>Chol<br>(1:1:1) | PA:<br>POPC:<br>Chol<br>(1:1:1) | POPC:<br>Chol<br>(1:1) |
|----|------------|------|------------------------------|------|------------------|---------------------------------|---------------------------------|---------------------------------|---------------------------------|------------------------|
| 6  | OlyA6      | 5200 | 6500                         | 1000 | 9500             | 4100                            | 9000                            | 7400                            | 5500                            | 8400                   |
|    | HetA       | 5200 | 6500                         | 1000 | 9500             | 4100                            | 9000                            | 7400                            | 5500                            | 8400                   |
|    | NudA       | 5200 | 6500                         | 1000 | 9500             | 4100                            | 9000                            | 7400                            | 5500                            | 8400                   |
| 7  | OlyA6      | 5500 | 10000                        | 3800 | 12000            | 6000                            | 8200                            | 6800                            | 7100                            | 8000                   |
|    | HetA       | 5500 | 10000                        | 3800 | 12000            | 6000                            | 8200                            | 6800                            | 7100                            | 8000                   |
|    | NudA       | 5200 | 7000                         | 3800 | 8800             | 4700                            | 8200                            | 4100                            | 5600                            | 8000                   |
| 8  | OlyA6      | 4800 | 6000                         | 1000 | 9000             | 3800                            | 7800                            | 3500                            | 5000                            | 8500                   |
|    | HetA       | 4800 | 6000                         | 1000 | 9000             | 3800                            | 7800                            | 3500                            | 5000                            | 8500                   |
|    | NudA       | 4800 | 6000                         | 1000 | 9000             | 3800                            | 7800                            | 3500                            | 5000                            | 8500                   |

OlyA6, ostreolysin A6; HetA, heterolysin A; NudA, nudolysin A; Sf9, lipid isolate of *Spodoptera frugiperda* Sf21 cells; CPE, ceramide phosphoethanolamine; POPC, 1-palmitoyl-2-oleoyl-*sn*-glycero-3-phosphocholine; Chol, cholesterol; RBC, lipid isolate from bovine erythrocyte; SM, sphingomyelin; PS, phosphatidylserine; PE, phosphatidylethanolamine; CL, cardiolipin; PA, phosphatidic acid; SPR, surface plasmon resonance; RU, response unit.

**Table S5.** The list of primers used in the study.

| Name      | Sequence (5'-3')                        | Gene amplification |
|-----------|-----------------------------------------|--------------------|
| F-HetA    | TTT TTT CAT ATG GCT TAC GCT CAG TGG G   | HetA               |
| R-HetA    | TTT TTT CTC GAG GCT ACC GCG AGG         |                    |
| F-HetB    | TTT TTT GGA TCC ATT GCT GGA GAC ACG     | HetB               |
| R-HetB    | TTT TTT ACG CGT TTA CTC TTC ACC AGA     |                    |
| Δ37VerA-F | TTT TTT CAT ATG CGT GCG TAC GCG CAG TG  | Δ37VerA            |
| Δ37VerA-R | TTT TTT CTC GAG GCC TTT ATA CAC GGT TTC |                    |
| F-NudA    | TTT TTT CAT ATG GCG TAT GCG CAG TG      | NudA               |
| R-NudA    | TTT TTT CTC GAG GCC GCT GCC             |                    |
| F-NudB    | TTT TTT CAT ATG GGC AGC GAA GGC AAA     | NudB               |
| R-NudB    | TTT TTT GGA TCC TTA CTC CTC GTT AGA GT  |                    |
| F-MucA    | TTT TTT CAT ATG GCG TAC GCA CAA TG      | MucA               |
| R-MucA    | TTT TTT CTC GAG GCC GCT GCC             |                    |
| F-MucB    | TTT TTT CAT ATG GGC AGC GAA GGC AAA     | MucB               |
| R-MucB    | TTT TTT CTC GAG TTA CTC CTC GCG GG      |                    |

F, forward; R, reverse; HetA, heterolysin A; HetB, heterolysin B; Δ37VerA, deletion mutant of versicolysin A; NudA, nudolysin A; NudB, nudolysin B; MucA, mucolysin A; MucB, mucolysin B.

**Table S6.** The list of proteins, corresponding vectors, cloning sights, and sizes of expressed proteins.

| Protein | Vector and antibiotic resistance | Restriction sights             | Size of the expressed proteins (kDa) |
|---------|----------------------------------|--------------------------------|--------------------------------------|
| HetA    | pET21c(+) (Ap)                   | <i>Nde</i> I and <i>Xho</i> I  | 17.5                                 |
| HetB    | pET8c(+) (Ap)                    | <i>Bam</i> HI and <i>Mlu</i> I | 53.5                                 |
| VerA    | pET21b(+) (Ap)                   | <i>Nde</i> I and <i>Xho</i> I  | 20.1                                 |
| VerB    | pET28a(+) (Kn)                   | <i>Nde</i> I and <i>Xho</i> I  | 54.5                                 |
| Δ37VerA | pET21b(+) (Ap)                   | <i>Nde</i> I and <i>Xho</i> I  | 16.1                                 |
| NudA    | pET21c(+) (Ap)                   | <i>Nde</i> I and <i>Xho</i> I  | 17.7                                 |
| NudB    | pET19b(+) (Ap)                   | <i>Nde</i> I and <i>Bam</i> HI | 57.3                                 |
| MucA    | pET21c(+) (Ap)                   | <i>Nde</i> I and <i>Xho</i> I  | 15.8                                 |
| MucB    | pET28a(+) (Kn)                   | <i>Nde</i> I and <i>Xho</i> I  | 57.0                                 |

HetA, heterolysin A; HetB, heterolysin B; VerA, versicolysin A; VerB, versicolysin B; Δ37VerA, deletion mutant of versicolysin A; NudA, nudolysin A; NudB, nudolysin B; MucA, mucolysin A; MucB, mucolysin B; Ap, ampicilin; Kn, kanamycin; kDa, kilo Dalton.

**Table S7.** Signal peptides prediction.

| Aegerolysin     | Prediction | Other  | Sec/SPI |
|-----------------|------------|--------|---------|
| OlyA6           | No SP      | 0.8345 | 0.1655  |
| NudA            | No SP      | 1      | 0       |
| MucA            | No SP      | 1      | 0       |
| HetA            | No SP      | 1      | 0       |
| VerA            | No SP      | 1      | 0       |
| Partner protein |            |        |         |
| PlyB            | No SP      | 1      | 0       |
| NudB            | No SP      | 1      | 0       |
| MucB            | No SP      | 1      | 0       |
| HetB            | No SP      | 1      | 0       |
| VerB            | No SP      | 1      | 0       |

The SignalP 6.0 algorithm predicts signal peptides and the location of their cleavage sites using a machine learning model in proteins from Eukarya [37]. Sec/SPI - "standard" secretion signal peptides are transported by the Sec translocon and cleaved by signal peptidase I. OlyA6, ostreolysin A6; NudA, nudolysin A; MucA, mucolysin A; HetA, heterolysin A; VerA, versicolysin A; PlyB, pleurotolysin B; NudB, nudolysin B; MucB, mucolysin B; HetB, heterolysin B; VerB, versicolysin B; NO SP, no signal peptide; Sec/SPI, Sec translocon signal peptidase I.

**Table S8.** Protein localization prediction.

| Localiza-<br>tion | Aegerolysins |        |        |        |        | MACPF partner proteins |        |        |        |        | Thresh-<br>old |
|-------------------|--------------|--------|--------|--------|--------|------------------------|--------|--------|--------|--------|----------------|
|                   | OlyA6        | NudA   | MucA   | HetA   | VerA   | PlyB                   | NudB   | MucB   | HetB   | VerB   |                |
| C                 | 0.6021       | 0.6107 | 0.5291 | 0.5430 | 0.6027 | 0.4151                 | 0.5263 | 0.4468 | 0.4872 | 0.5240 | 0.4761         |
| N                 | 0.4953       | 0.4735 | 0.5495 | 0.3387 | 0.4169 | 0.2215                 | 0.2894 | 0.2470 | 0.2729 | 0.2334 | 0.5014         |
| E                 | 0.7932       | 0.7508 | 0.6460 | 0.7606 | 0.7898 | 0.7000                 | 0.5695 | 0.6129 | 0.6572 | 0.5314 | 0.6173         |
| CM                | 0.3246       | 0.3137 | 0.2558 | 0.2373 | 0.1400 | 0.4094                 | 0.3962 | 0.3931 | 0.4038 | 0.5039 | 0.5646         |
| M                 | 0.2421       | 0.2370 | 0.3029 | 0.3169 | 0.1926 | 0.1224                 | 0.1174 | 0.1183 | 0.1141 | 0.0762 | 0.6220         |
| PL                | 0.0030       | 0.0041 | 0.0102 | 0.0160 | 0.0520 | 0.0598                 | 0.0419 | 0.0677 | 0.0970 | 0.1018 | 0.6395         |
| ER                | 0.0718       | 0.0949 | 0.0554 | 0.0492 | 0.0740 | 0.0748                 | 0.0717 | 0.1136 | 0.0861 | 0.0747 | 0.6090         |
| L/V               | 0.0963       | 0.1597 | 0.1202 | 0.1914 | 0.1658 | 0.2067                 | 0.1544 | 0.1564 | 0.1633 | 0.1502 | 0.5848         |
| GA                | 0.1402       | 0.2194 | 0.3174 | 0.1876 | 0.1387 | 0.2461                 | 0.2300 | 0.2560 | 0.3056 | 0.2537 | 0.6494         |
| PE                | 0.0087       | 0.0091 | 0.0217 | 0.0405 | 0.0782 | 0.2543                 | 0.2513 | 0.2583 | 0.2080 | 0.1342 | 0.7364         |

The presence or absence of a signal peptide does not say everything about the localization of eukaryotic proteins. The prediction program for the subcellular localization **DeepLoc 2.0**, can find more about the sorting of these proteins [38]. OlyA6, ostreolysin A6; NudA, nudolysin A; MucA, mucolysin A; HetA, heterolysin A; VerA, versicolysin A; PlyB, pleurotolysin B; NudB, nudolysin B; MucB, mucolysin B; HetB, heterolysin B; VerB, versicolysin B; C, cytoplasm; N, nucleus; E, extracellular; CM, cell membrane; M, mitochondrion; PL, plastid; ER, endoplasmic reticulum; L/V, lysosome/vacuole; GA, Golgi apparatus; PE, peroxisome; MACPF, membrane attack complex/perforin.

### 3. Supplementary figures

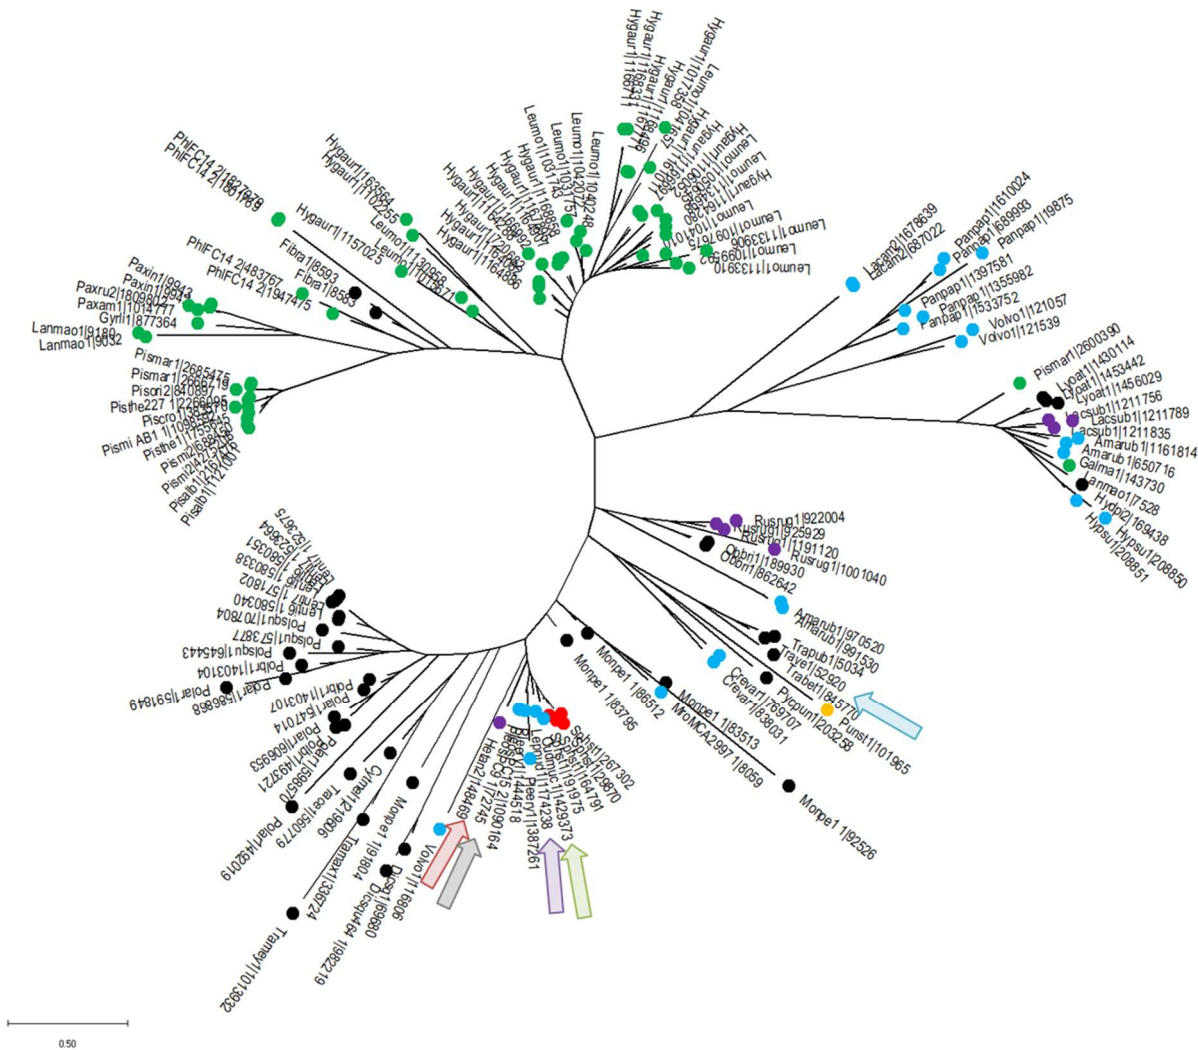

**Figure S1.** Phylogenetic analysis of aegerolysins from Agaricomycetes. Aegerolysins (160) from published fungal genomes (60) identified in the JGI MycoCosm database [79] by Pfam protein domain PF06355 (Table S1). After muscle alignment



of the sequences (139), maximum likelihood phylogenetic tree was inferred using the MEGA tools [26,27]. Aegerolysins belonging to different orders of *Agaricomycetes* [25] are marked with closed colored circles: *Agaricales*, blue; *Boletales*, green; *Corticiales*, orange; *Gastrales*, red; *Polyporales*, black; and *Russulales*, purple. Aegerolysins from selected fungal species are indicated with arrows: pleurotolysin A from *P. ostreatus* PC9 (PleosPC9\_1|72745, grey), heterolysin A from *H. irregulare* (Hetan2|148469, ruby), nudolysin A from *L. nuda* CBS 247.69 (Lepnud1|1174238, violet purple), versicolysin A from *T. versicolor* (Trave1|52920, deep teal), and mucolysin A from *M. mucida* (CBS 558.79, Oudmuc1|1429373, green).

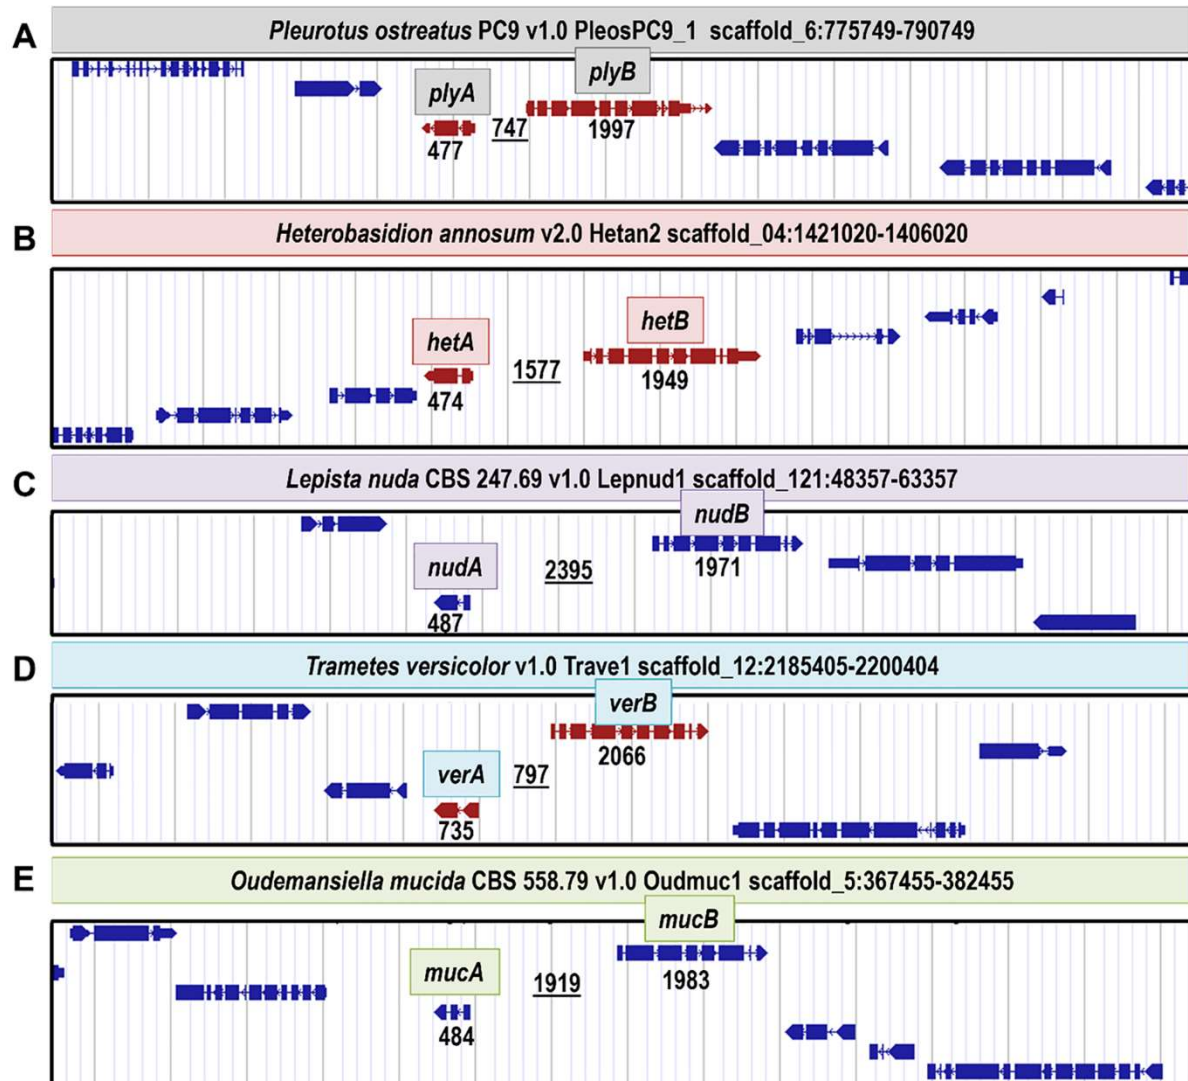

**Figure S2.** Aegerolysin gene loci in fungal genomes. Aegerolysin and MACPF genes: *plyA* and *plyB*, pleurotolysin A and B from *Pleurotus ostreatus* PC9 v1.0 genome; *hetA* and *hetB*, heterolysin A and B from *Heterobasidion annosum* v2.0 (*H. irregulare*) genome; *nudA* and *nudB*, nudolysin A and B from *Lepista nuda* CBS 247.69 v1.0; *verA* and *verB*, versicolysin A from *Trametes versicolor* v1.0; and *mucA* and *mucB*, mucolysin A and B from *Oudemansiella mucida* CBS 558.79 v1.0 (*Mucidula mucida*) from JGI MycoCosm database [79]; blue, automatically annotated genes; red, manually annotated genes; number, gene size in base pairs from the first to the last coding codon; underlined number, inter-gene distance; MACPF, membrane attack complex/perforin.



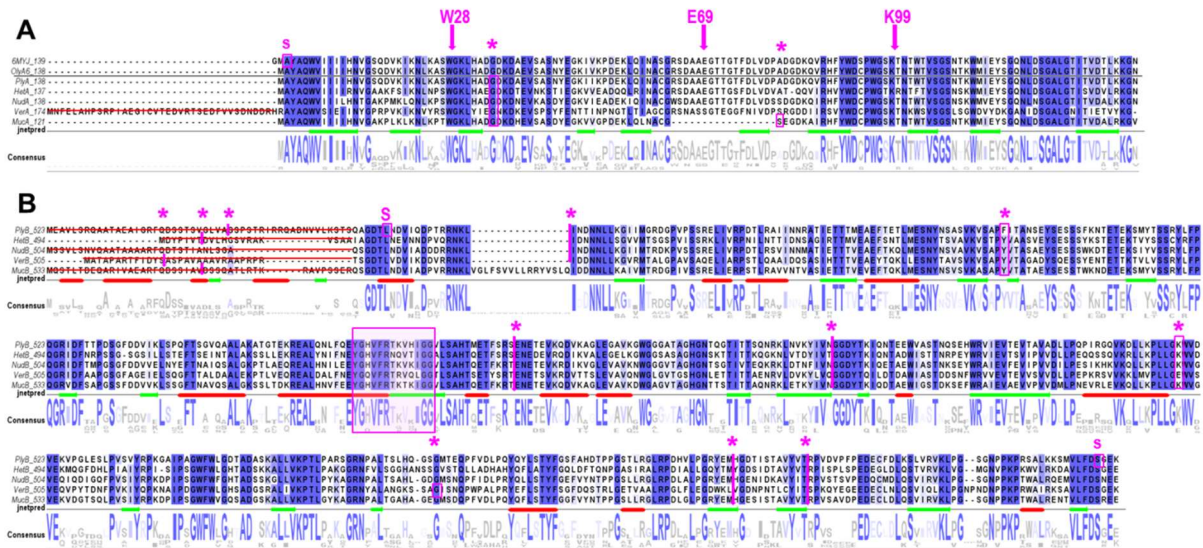

**Figure S3.** Alignments of amino acid sequences and prediction of secondary structures of selected aegerolysins and MACPF proteins. A multiple sequence alignment was performed using the muscle algorithm and presented by Jalview [52]. The alignment is colored according to percent of identity (blue, >50 %); the consensus sequence is shown below; magenta asterisk, arrow or box, position of the intron at the protein level); magenta s and box, start and end of the PlyB sequence from PDB ID: 4OEJ structure. The secondary structures of the proteins were predicted using the JPred4 server, which is accessible via Jalview [52]. JNetPRED consensus prediction for 6MYJD and PlyB sequences, respectively: green sheets, and red helices. Red strikethrough, N-terminus sequence omitted from the expression constructs. (A) PDB ID: 6MYJD–OlyA6–PlyA, ostreolysin A6–pleurotolysin A from *P. ostreatus*; HetA, heterolysin A from *H. irregularis*; NudA, nudolysin A from *L. nuda*; VerA, versicolysin A from *T. versicolor*; and MucA, mucolysin A from *M. mucida*. The positions of the amino acids involved in SM binding in the PDB ID–6MYJD structure are numbered [32]; SM, sphingomyelin. (B) Partner proteins: PlyB, pleurotolysin B; HetB, heterolysin B; NudB, nudolysin B; VerB, versicolysin B; and MucB, mucolysin B. Larger magenta box, typical signature Y/F-G-X<sub>2</sub>-F/Y-X<sub>6</sub>-G-G for the MACPF domain in fungi, [29]; MACPF, membrane attack complex/perforin.

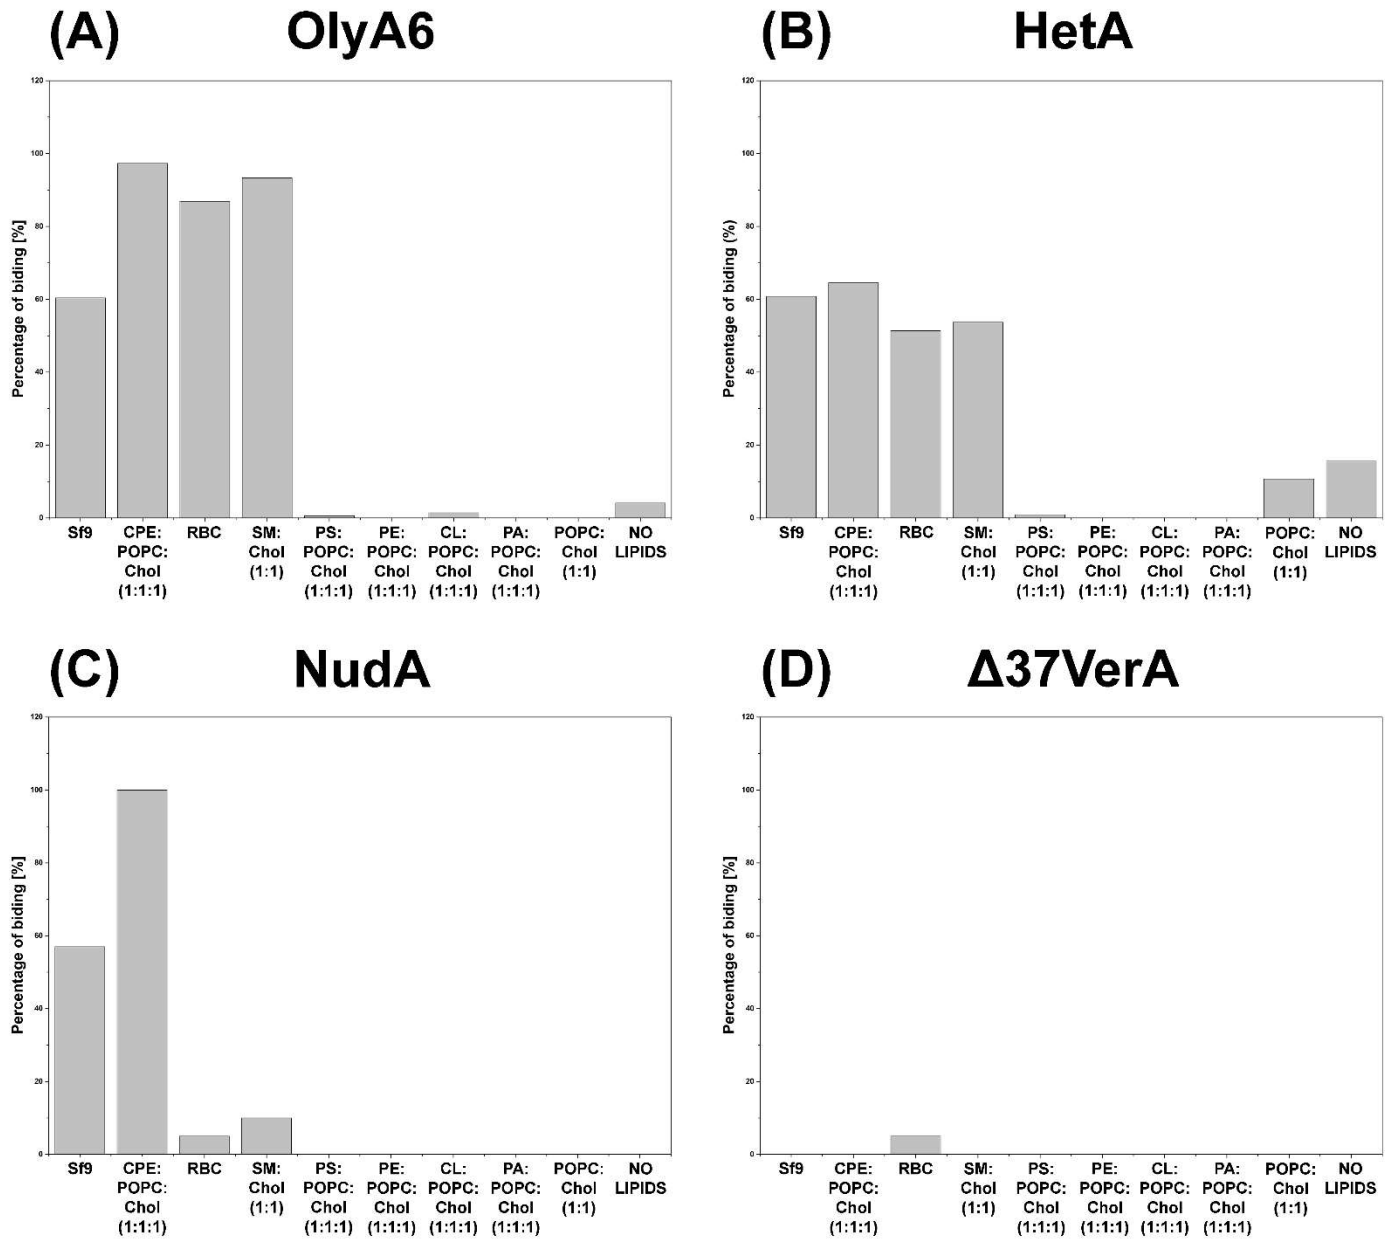

**Figure S4.** Assessment of OlyA6, HetA, NudA and Δ37VerA association with lipid vesicles at pH 8.0. SDS-PAGE of pellets (membrane-bound proteins) collected after MLV sedimentation assays. Quantification of MLV sedimentation assay results using GelQuantNET. Representative data of triplicates are shown. OlyA6, ostreolysin A6; HetA, heterolysin A; NudA, nudolysin A, Δ37VerA, truncated version of versicolysin A; Sf9, total lipid extract from *Spodoptera frugiperda* Sf21 cells; CPE, ceramide phosphoethanolamine; POPC, 1-palmitoyl-2-oleoyl-*sn*-glycero-3-phosphocholine; Chol, cholesterol; RBC, total lipid extract from bovine erythrocytes; SM, sphingomyelin; PS, phosphatidylserine; PE, phosphatidylethanolamine; CL, cardiolipin; PA, phosphatidic acid. Representative data of triplicate experiments, in which the standard error did not exceed 5%, are shown.

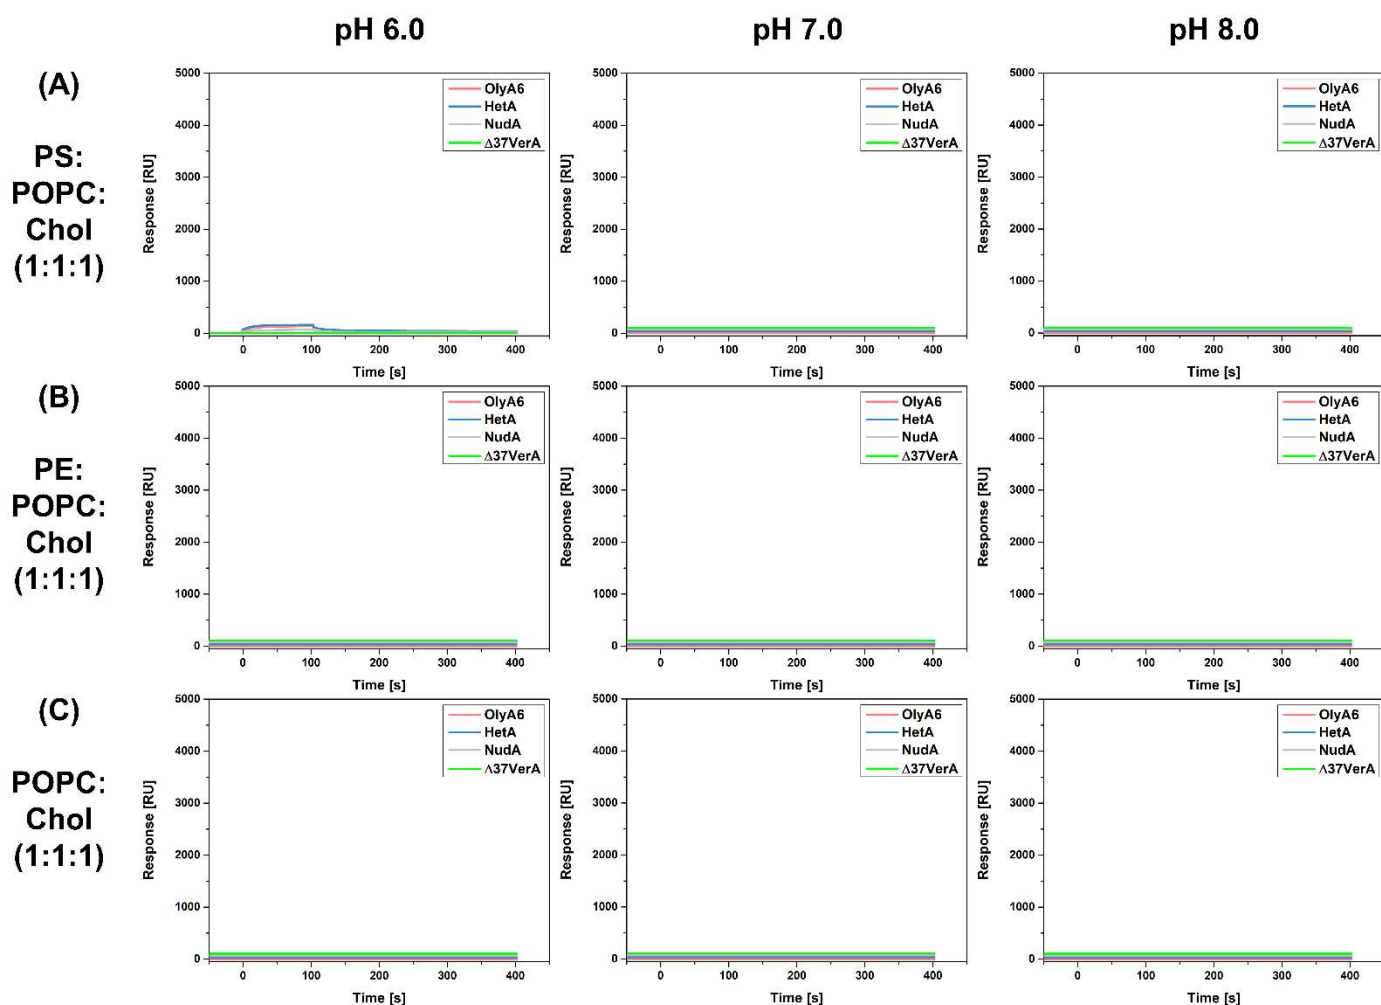

**Figure S5.** Surface plasmon resonance analysis of interaction of aegerolysins with LUVs containing glycerophospholipid receptors. Large unilamellar vesicles (LUVs) containing PS (**A**), PE (**B**), or only POPC and Chol (**C**) were immobilized on a Biacore L1 chip to 3.500 – 9.000 RU and analytes (OlyA6, NudA, HetA and  $\Delta 37\text{VerA}$  in the 5  $\mu\text{M}$  concentration) injected at a flow rate of 10  $\mu\text{L}/\text{min}$  with association time 1 min in a running buffer (pH 6.0, 7.0, or 8.0) at 25  $^{\circ}\text{C}$ . Representative sensorgrams of triplicates are shown. OlyA6, ostreolysin A6; HetA, heterolysin A; NudA, nudolysin A;  $\Delta 37\text{VerA}$ , deletion mutant of versicolysin A; POPC; 1-palmitoyl-2-oleoyl-*sn*-glycero-3-phosphocholine; Chol, cholesterol; PS, phosphatidylserine; PE, phosphatidylethanolamine; SPR, surface plasmon resonance.

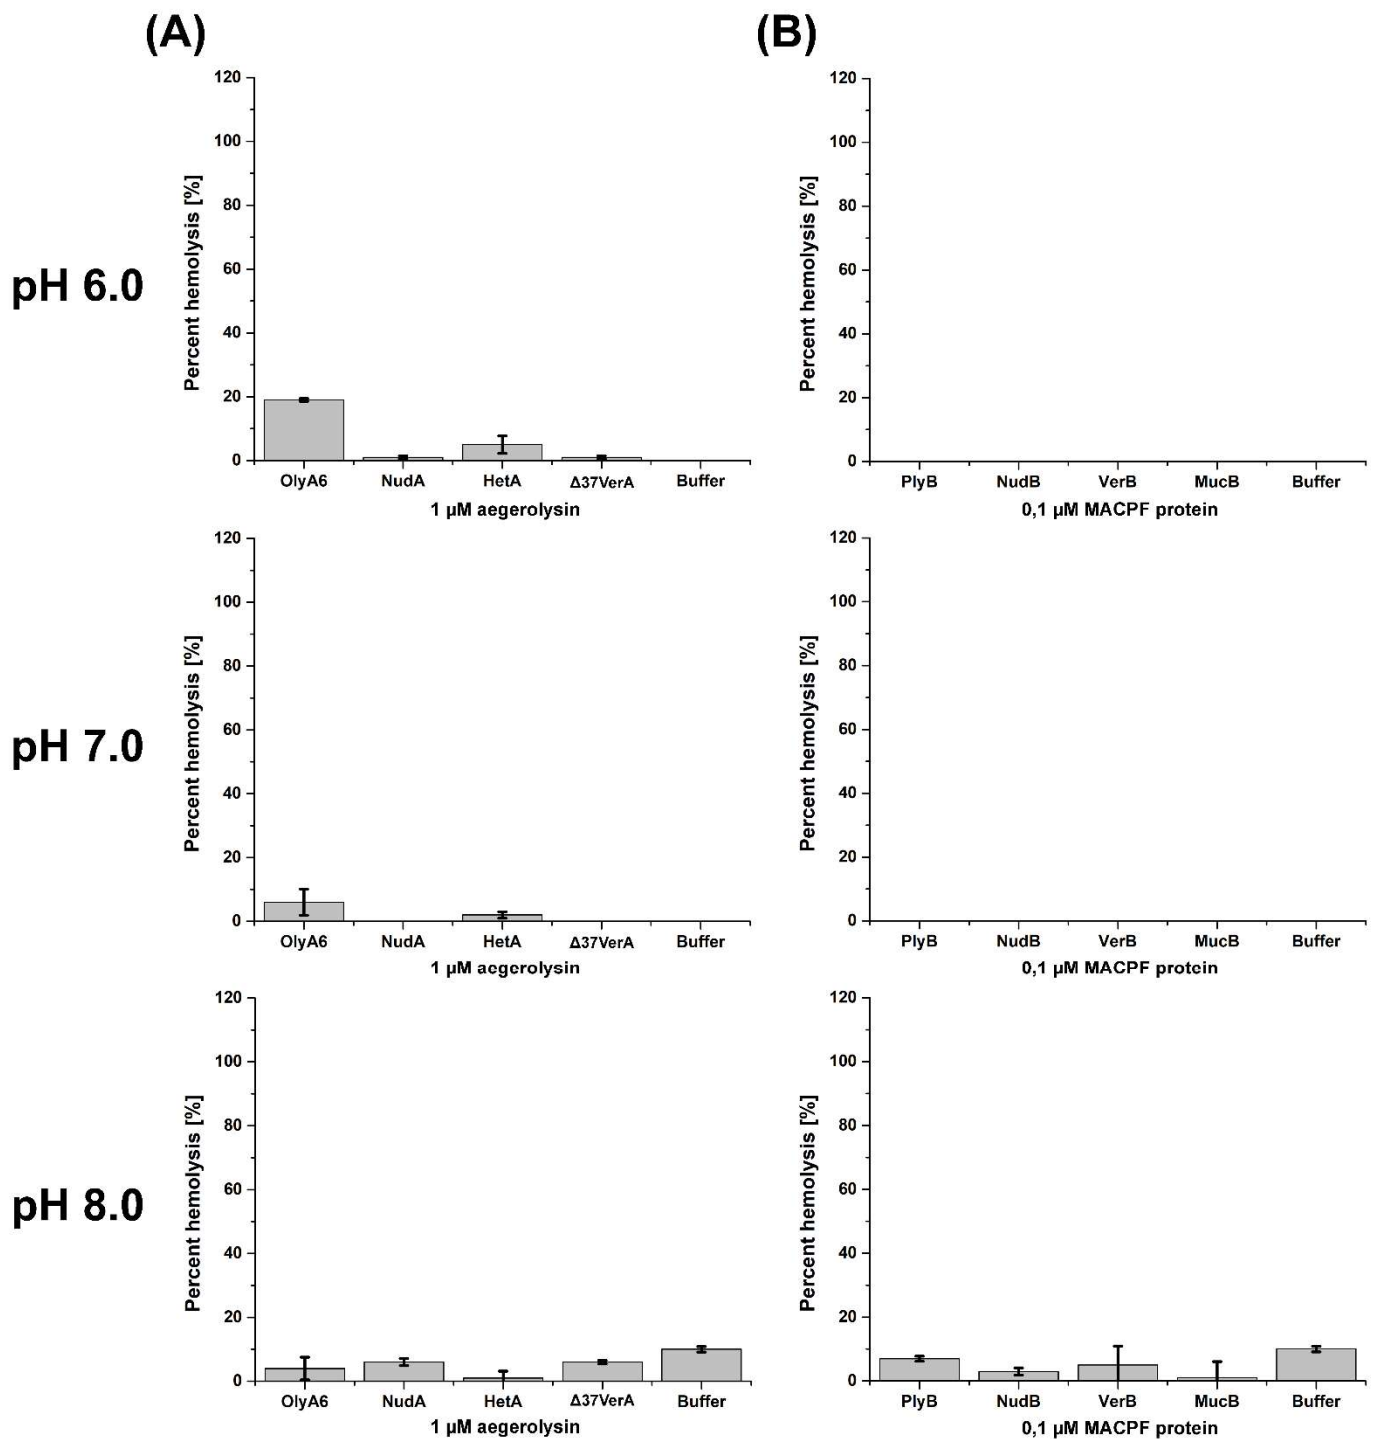

**Figure S6.** Hemolytic activity of 1  $\mu$ M aegerolysins or 0.1  $\mu$ M MACPF proteins at pH 6.0, 7.0, and 8.0. Percentage of hemolysis of RBC cells treated with 1  $\mu$ M OlyA6, NudA, HetA, or  $\Delta 37$ VerA, or with 0.1  $\mu$ M PlyB, NudB, VerB, or MucB, is expressed as the ratio of absorbances (630 nm) of RBC at the beginning (time = 0) and at the end of the experiment (time = 60 min)  $\times$  100. OlyA6, ostreolysin A6; HetA, heterolysin A; NudA, nudolysin A,  $\Delta 37$ VerA, truncated version of versicolysin A; PlyB, pleurotolysin B; NudB, nudolysin B, VerB versicolysin B; MucB, mucolysin B; RBC; bovine red blood cells; MACPF, membrane attack complex/perforin.

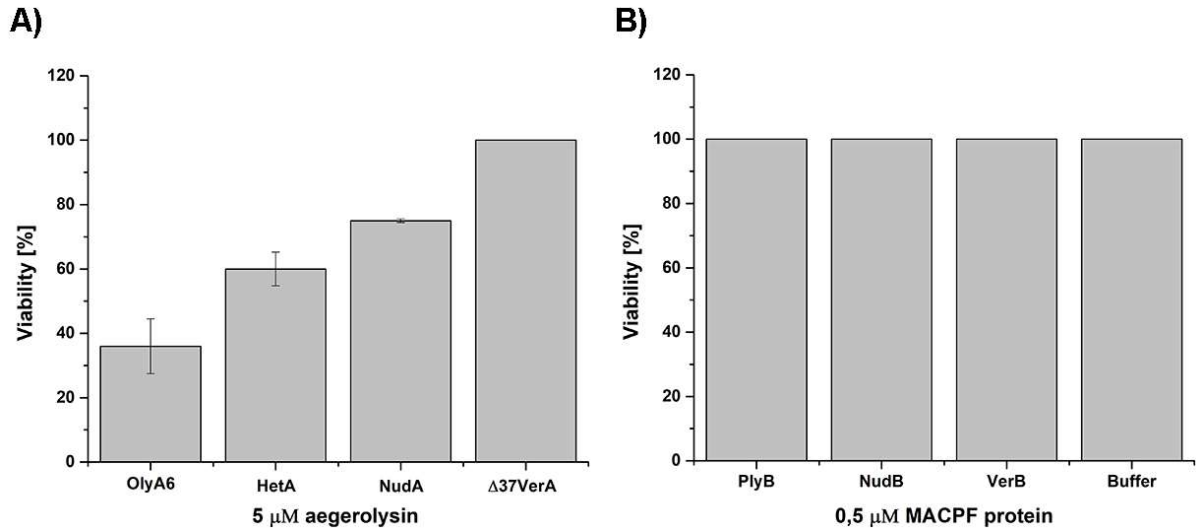

**Figure S7.** Effect of aegerolysins and their native MACPF protein partners alone on survival of Sf9 cells. Percentage of viability in % of Sf9 cells treated with 5 μM OlyA6, HetA, NudA, or Δ37VerA or 0.5 μM PlyB, NudB, or VerB is expressed as absorbance of treated cells/ absorbance of control cells × 100 % after 1 h exposure. Data are means ± SD from three independent experiments. OlyA6, ostreolysin A6; HetA, heterolysin A; NudA, nudolysin A, Δ37VerA, truncated version of versicolysin A; PlyB, pleurotolysin B; NudB, nudolysin B; VerB versicolysin B; Sf9, *Spodoptera frugiperda*; MACPF, membrane attack complex/perforin.
